# Supplementary material for: Differential expression of microRNAs by arsenate and arsenite stress in natural accessions of rice
Source: Royal Society of Chemistry journal article supplement (doi:10.1039/c4mt00264d), 2014-11-19
Supplement: c4mt00264d1.pdf [file c4mt00264d1.pdf]

**Table S1: List of oligonucleotides used for the expression analysis of target genes**

| S.No | Locus          | Forward primer (5'-3')      | Reverse primer (5'-3')    |
|------|----------------|-----------------------------|---------------------------|
| 1    | Os06g4627<br>0 | GAGCCATGGGACCTTCCT          | TTGGGCGATCTTTTCCTG        |
| 2    | Os01g6572<br>0 | CCGTTGGATTACAGTTTTGGA       | GCCATTTCTGTGCCAATA        |
| 3    | Os03g0994<br>0 | AGGGTGCAATCTGTTGTCCT        | GCAATGGCCATCTGTATGC       |
| 4    | Os05g4839<br>0 | GGAGCACACTACTGATGATTT<br>GG | GTCTCCAGCAGATTCTTCCA<br>G |
| 5    | Os09g2152<br>0 | GAGGCCTTCGCTTGTTCA          | CCATGTGTTTTGCCACTCC       |
| 6    | Os07g3829<br>0 | TACGAGGTGGGCGACAAG          | CCGAGTTTAGTTCCCAAACG      |
| 7    | Os12g0876<br>0 | GTCTCCGGCTCCTTCCTC          | AGCATTGCCACCACCAGT        |
| 8    | Os03g0201<br>0 | TCCCAATGGAATGAATGTCTT       | CCCCAGTCTGTGGAGAGCTA      |
| 9    | Os05g0721<br>0 | TGGGGATGTCTCAGGATGTC        | CGTTGCAATCCCAAACCT        |
| 10   | Os11g0895<br>0 | GCCAACAAAGTGGAGAGGAT        | TTGAGGTGTTGGTCTGATGC      |
| 11   | Os02g1887<br>0 | ATCCCCGTCGACTACATCG         | TTCAAGGTATGGAGGCACAA      |
| 12   | Os05g1866      | AGCTACCCATGGTTGTCAGC        | TATTTTCATTGCCAGTGAGC      |

---

0

AG

---

**Table S2: List of differentially expressed miRNAs in HARG and LARG rice cultivars in AsIII and AsV stress**

| <b>As III 25 <math>\mu</math>M treatment</b> |             |             |  |
|----------------------------------------------|-------------|-------------|--|
| <b>miRNA</b>                                 | <b>HARG</b> | <b>LARG</b> |  |
| miR156                                       | Down        | -           |  |
| miR156k                                      | -           | Down        |  |
| miR159c,d,e                                  | Up          | Down        |  |
| miR159f                                      | -           | Down        |  |
| miR160e                                      | Down        | Down        |  |
| miR160b,f                                    | -           | Down        |  |
| miR162a                                      | Up          | -           |  |
| miR162b                                      | Down        | Down        |  |
| miR164                                       | Up          | -           |  |
| miR164a,b,c,d,e,f                            | Down        | Down        |  |
| miR166i                                      | Up          | -           |  |
| miR166a,b,c,d,e,f,g,h,k,l,n                  | Down        | Down        |  |
| miR167a                                      | Down        | -           |  |
| miR167g,h                                    | -           | Down        |  |
| miR168a                                      | -           | Down        |  |
| miR168b                                      | Down        | Down        |  |
| miR169a,b,f,p                                | -           | Down        |  |
| miR169d                                      | Down        | Down        |  |
| miR171a,b,d                                  | Down        | -           |  |
| miR171c,e,f,g,h                              | -           | Down        |  |
| miR172a                                      | Down        | -           |  |
| miR172d                                      | -           | Down        |  |
| miR319a,b                                    | Down        | Down        |  |
| miR390                                       | Down        | Down        |  |
| miR393, b-3p                                 | Down        | Down        |  |
| miR395a,e,g,k,l,m,n,q,r,s                    | -           | Down        |  |
| miR395b,d,h,I,j,p                            | Down        | -           |  |
| miR396d,e                                    | Up          | Down        |  |
| miR396e-3p,g,h,i                             | Down        | -           |  |

|                              |      |      |
|------------------------------|------|------|
| miR397a                      | Up   | Down |
| miR397b                      | -    | Down |
| miR408                       | Up   | -    |
| miR414                       | Up   | Down |
| miR444b.1,b.2,c.1,c.2,d.3,f  | Down | Down |
| miR528                       | Up   | Down |
| miR529a                      | Up   | -    |
| miR529b                      | Down | Down |
| miR535                       | -    | -    |
| miR806a,b,c,d,e,f,g,h        | Down | Down |
| miR810                       | -    | Down |
| miR812a,e,g                  | Down | -    |
| miR812b,c,d,f,h,I,j          | -    | Down |
| miR815a,b,c                  | -    | Down |
| miR820a,b,c                  | Down | Down |
| miR1318                      | Down | Down |
| miR1320                      | Up   | Down |
| miR1423-5p.2, b              | Down | Down |
| miR1427                      | -    | Down |
| miR1432                      | Down | Down |
| miR1433                      | Up   | Down |
| miR1436                      | Down | Down |
| miR1440                      | Up   | Down |
| miR1846a-5p                  | Up   | Up   |
| miR1846e                     | Down | Down |
| miR1850                      | -    | Down |
| miR1857-3p                   | Down | Down |
| miR1858a                     | Up   | -    |
| miR1858b                     | -    | Down |
| miR1860                      | -    | Down |
| miR1861a,b,d,e,f,h,I,j,k,l,m | -    | Down |
| miR1862d                     | Up   | -    |
| miR1862a,b,c                 | Down | Down |

|              |      |      |
|--------------|------|------|
| miR1862d,e   | -    | Down |
| miR1863      | Down | -    |
| miR1863c     | -    | Down |
| miR1867      | Down | Down |
| miR1868      | Down | Down |
| miR1870      | Down | Down |
| miR1871      | Down | Down |
| miR1873      | Up   | Down |
| miR1874      | -    | Down |
| miR1876      | Down | Down |
| miR1879      | -    | Down |
| miR2055      | -    | Down |
| miR2091-5p   | Up   | Down |
| miR2096      | -    | Down |
| miR2097a,d   | -    | Down |
| miR2102-5p   | Up   | Down |
| miR2104      | -    | Down |
| miR2121a,b   | Down | Down |
| miR2123a,b,c | Down | Down |
| miR2862      | -    | Down |
| miR2870      | Down | -    |
| miR2877      | -    | Down |
| miR2906      | -    | Down |
| miR2907a,d   | Up   | Up   |
| miR2907b,c   | -    | Down |

---

**As(V) 50  $\mu$ M treatment**

---

| <b>miRNA</b>    | <b>HARG</b> | <b>LARG</b> |
|-----------------|-------------|-------------|
| miR166a,b,e,k,l | Down        | Down        |
| miR168b         | -           | Up          |
| miR169d         | -           | Up          |
| miR169n,o       | Up          | -           |
| miR169p         | -           | Down        |
| miR171a         | -           | Up          |

|                                 |      |      |
|---------------------------------|------|------|
| miR171g                         | Down | Up   |
| miR171h                         | -    | Down |
| miR172a,b,d                     | Up   | Up   |
| miR390                          | Down | -    |
| miR393                          | Up   | Down |
| miR395a,e,h,m,p,q,s             | -    | Down |
| miR395b,d,g,I,j,k,n             | Down | Down |
| miR396a,d,e,g                   | Up   | Up   |
| miR396h,i                       | -    | Up   |
| miR397a,b                       | Up   | Up   |
| miR408                          | Up   | Up   |
| miR414                          | -    | Down |
| miR444a.2,d.2,d.3,e,f           | Up   | Up   |
| miR528                          | Up   | Down |
| miR529b                         | Down | Down |
| miR531a,b                       | -    | Up   |
| miR810b.1                       | Up   | Down |
| miR812a,b,c,d,e                 | Up   | -    |
| miR820a,b,c                     | Down | -    |
| miR1318                         | -    | -    |
| miR1320                         | Up   | Up   |
| miR1423                         | Up   | -    |
| miR1425                         | Up   | -    |
| miR1427                         | Up   | Up   |
| miR1432                         | Down | -    |
| miR1433                         | -    | Down |
| miR1440                         | -    | Down |
| miR1846a-5p,b-5p,c-5p,d-3p,d-5p | Up   | Up   |
| miR1857-3p                      | Up   | -    |
| miR1861a,b,f,h,I,j,l            | Down | Down |
| miR1862c,e                      | Up   | -    |
| miR1863                         | -    | Up   |
| miR1863c                        | Up   | Down |

|                |      |      |
|----------------|------|------|
| miR1870        | -    | -    |
| miR1873        | -    | Down |
| miR1875        | -    | Up   |
| miR1879        | -    | Up   |
| miR1883a       | Up   | Up   |
| miR1884b       | Up   | -    |
| miR2091        | -    | Down |
| miR2096-3p     | Up   | -    |
| miR2102-3p     | Up   | Up   |
| miR2102-5p     | Down | Up   |
| miR2106        | -    | -    |
| miR2121a,b     | -    | Down |
| miR2870        | Up   | -    |
| miR2906a,b     | Up   | -    |
| miR2907a,b,c,d | Up   | Up   |

---

miRNAs with fold change over  $\pm 1$  and P-value  $< 0.05$ .

**Table S3: Identified common motifs in the upstream regions of As-stress induced miRNAs**

| <b>Common motifs</b> | <b>Description</b>                                | <b>Number of motifs</b> |
|----------------------|---------------------------------------------------|-------------------------|
| Skn-1_motif          | Required for endosperm expression                 | 85                      |
| MBS                  | MYB binding site involved in drought-inducibility | 74                      |
| CGTCA-motif          | MeJA-responsiveness                               | 71                      |
| TGACG-motif          | MeJA-responsiveness                               | 71                      |
| ARE                  | Anaerobic induction                               | 63                      |
| ABRE                 | Abscisic acid responsiveness                      | 54                      |
| TCA-element          | Salicylic acid responsiveness                     | 49                      |
| GARE-motif           | Gibberellin-responsive                            | 48                      |
| CCAAT-box            | MYB binding site                                  | 36                      |
| TC-rich repeat       | Defense and stress responsiveness                 | 39                      |
| HSE                  | Heat stress responsiveness                        | 37                      |
| GC-motif             | Anoxic specific inducibility                      | 32                      |
| P-box                | Gibberellin-responsive                            | 32                      |
| TATC                 | Gibberellin-responsive                            | 32                      |
| Box-W1               | Fungal elicitor responsive                        | 24                      |
| LTR                  | Low-temperature responsive                        | 24                      |
| ERE                  | Ethylene-responsive                               | 15                      |
| EIRE                 | Elicitor-responsive                               | 11                      |
| motif IIb            | Abscisic acid responsiveness                      | 9                       |
| CE3                  | ABA and VP1 responsiveness                        | 7                       |



**Table S4: Metal-responsive elements in As-responsive miRNAs promoters**

| <b>MRE in osa-miRNA</b> | <b>site</b>  |
|-------------------------|--------------|
| osa-miR164a (-)         | -189, -1880  |
| osa-miR171c (-)         | -761         |
| osa-miR171d (+)         | -1932        |
| osa-miR395t (-)         | -620         |
| osa-miR396a (+)         | -1262        |
| osa-miR399b (-)         | -1359        |
| osa-miR399f (-)         | -1505        |
| osa-miR399h (+)         | -714         |
| osa-miR528 (+)          | -951, -1644  |
| osa-miR1846c (+)        | -1129, -1172 |
| osa-miR1846d (+)        | -579, -1411  |
| osa-miR1861i (+)        | -1046, -1666 |
| osa-miR1861j (-)        | -865         |
| osa-miR1861k (-)        | -649, -1986  |
| osa-miR1861n (-)        | -324         |
| osa-miR2102 (+)         | -1904        |
